# Supplementary material
Source: Springer Nature journal article supplement (https://www.springermedizin.de/resource/supplementary/12943_2014_1391_MOESM11_ESM.pdf/9552854)

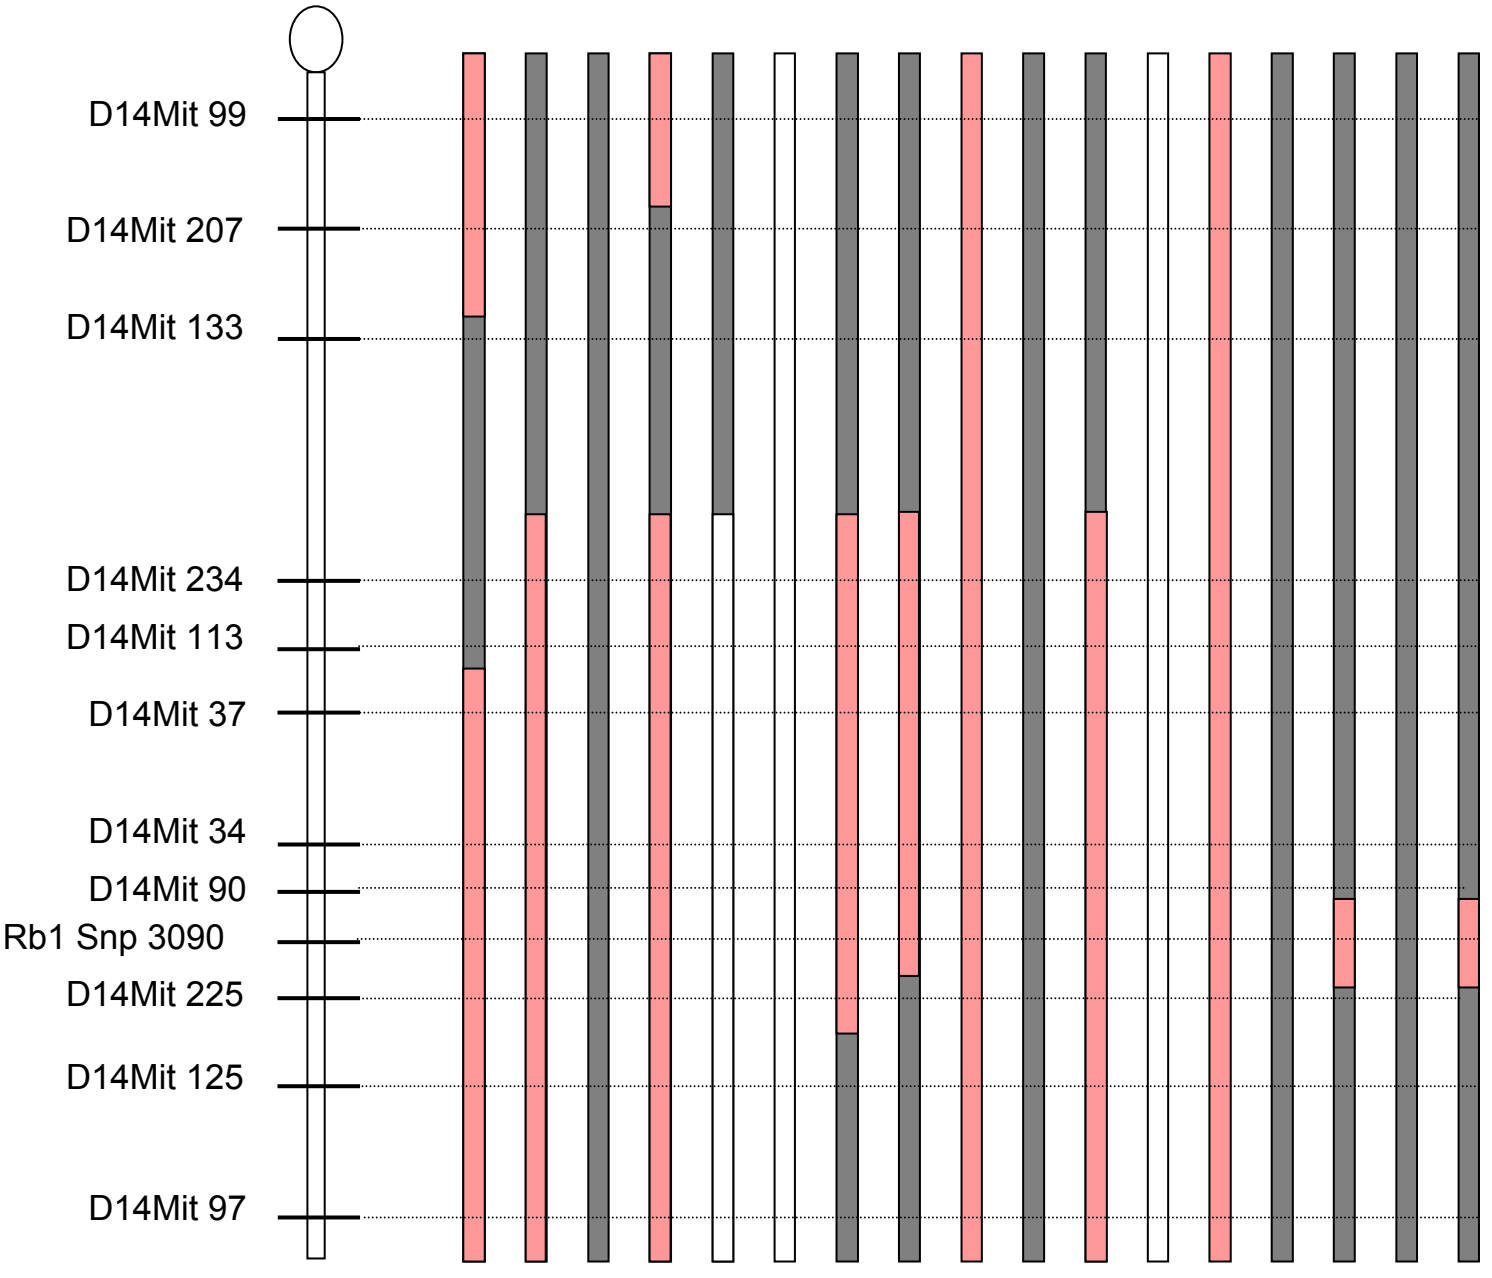

Supplement: MOESM11 [file 9552854]
